# Supplementary material for: Serum fingerprinting by slippery liquid-infused porous SERS for non-invasive lung cancer detection
Source: Royal Society of Chemistry journal article supplement (doi:10.1039/d2an01325h), 2022-01-01
Supplement: d2an01325h1.pdf [file d2an01325h1.pdf]

## Electronic Supporting Information

# Serum fingerprinting by slippery liquid-infused porous SERS for non-invasive lung cancer detection

Chenlei Cai,<sup>a,†</sup> Yujie Liu,<sup>b,†</sup> Jiayu Li,<sup>a</sup> Lei Wang<sup>\*a</sup> and Kun Zhang<sup>\*b</sup>

a. Department of Medical Oncology, Shanghai Pulmonary Hospital, Tongji University School of Medicine, Shanghai, 200433 China.

b. Shanghai Institute for Pediatric Research, Shanghai Key Laboratory of Pediatric Gastroenterology and Nutrition, Xinhua Hospital, Shanghai Jiao Tong University School of Medicine, Shanghai 200092, China.

†Chenlei Cai and Yujie Liu contributed equally to this work.

\*Corresponding author

E-mail: wangleixxn@163.com; kunzhang@shsmu.edu.cn

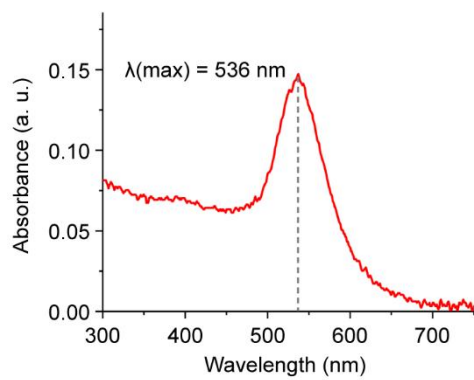

**Fig. S1** UV-vis absorption spectrum of Au NPs determined on a Nanodrop 2000 spectrophotometer.

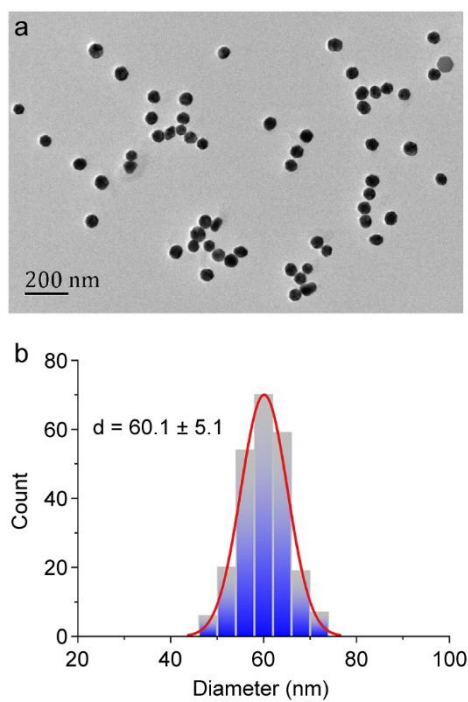

**Fig. S2** (a) TEM image of Au NPs. (b) Size distribution of Au NPs estimated from the SEM result.

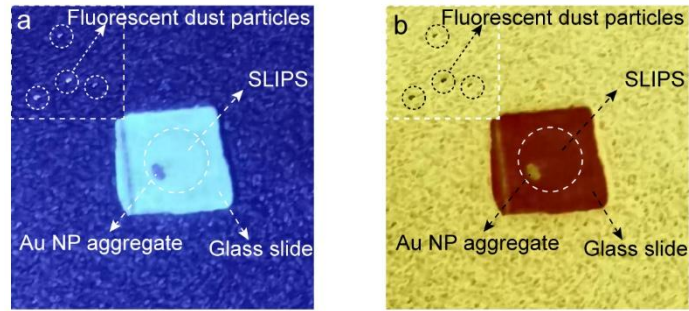

**Fig. 3** (a) Photograph of Au NP aggregate formed by evaporating Au NP solution containing 0.02 mM of methylene blue under 365 nm UV irradiation. (b) Color inversion mode of the photograph in (a). Insert at the left-up corner showing the fluorescent dust particles at the desk surface. These fluorescent dusts were used as the luminescent references. From the above photographs, especially the picture b, we observed no apparent photoluminescence at the SLIPS after droplet evaporation, indicating high efficiency of sample collection of the SLIP substrate.

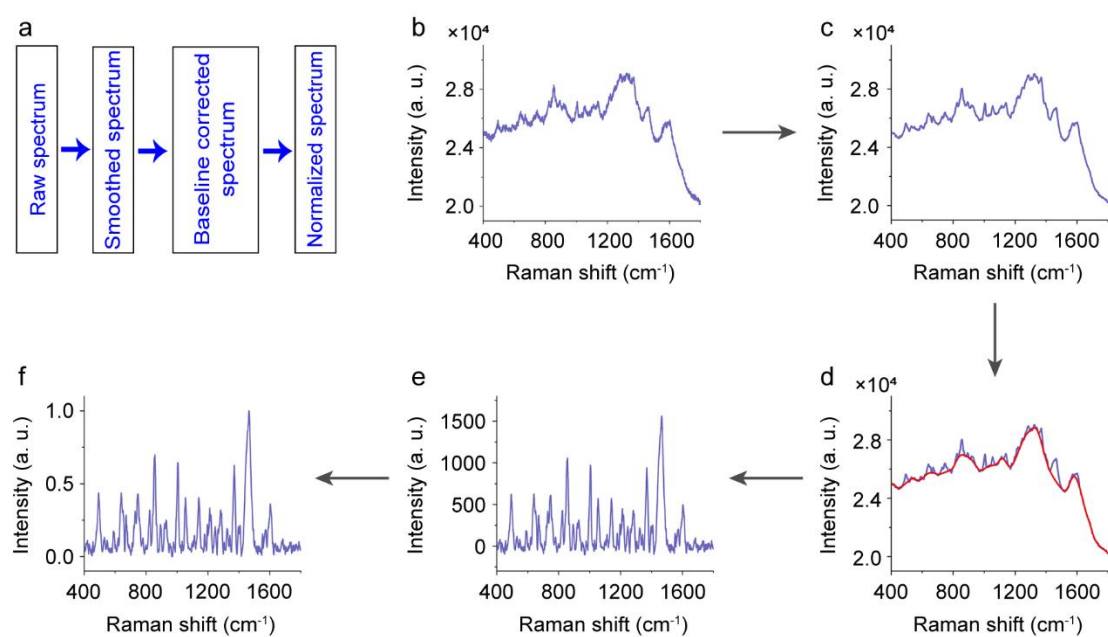

**Fig. S4** (a) Pipeline of SERS spectral preprocessing. (b) A Raw SERS spectrum. (c) The smoothed spectrum. For reproducibility, the raw spectrum was first subjected to cosmic ray removal and then denoised by the Savitzky-Golay algorithm (polynomial order 3, points of window 11). (d) Baseline correction using the Asymmetric least-squares algorithm (asymmetric factor  $1 \times 10^{-3}$ , threshold 0.075, iteration number 10). (e) The baseline-corrected spectrum. (f) The min-max normalized spectrum.

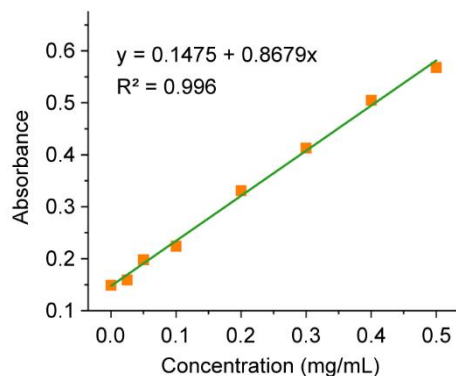

**Fig. S5** Calibration curve for BCA testing of the serum protein concentration.

The protein concentration of the ultrafiltration (Millipore, 3 KD)-treated serum was tested with the bicinchoninic acid (BCA) Protein Assay kit (Biyuntian, China) according to the manufacturer's Instruction. From the calibration curve in **Fig. S5**, we measured that the protein concentrations of the serum samples were in the range of 0.019 to 0.031 mg/mL, three orders of magnitude lower than normal physiological values (60 to 120 mg/mL). The result indicates that some low-abundance low-molecular-weight proteins are retained in the samples, although the large, high-abundance proteins such as HAS (66 KD) has been removed. We infer that these small proteins and the serum polypeptides may contribute to the amide vibrational modes in the SERS spectra.

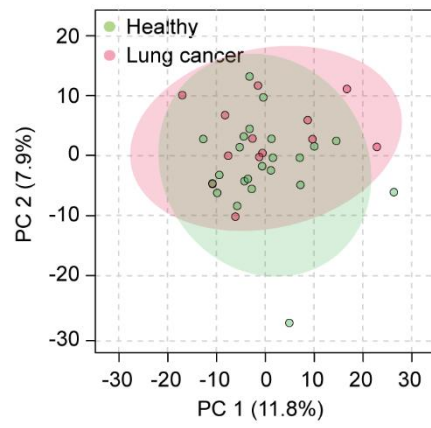

**Fig. S6** PCA of SERS data of serum samples from 13 healthy controls and 23 lung cancer patients.

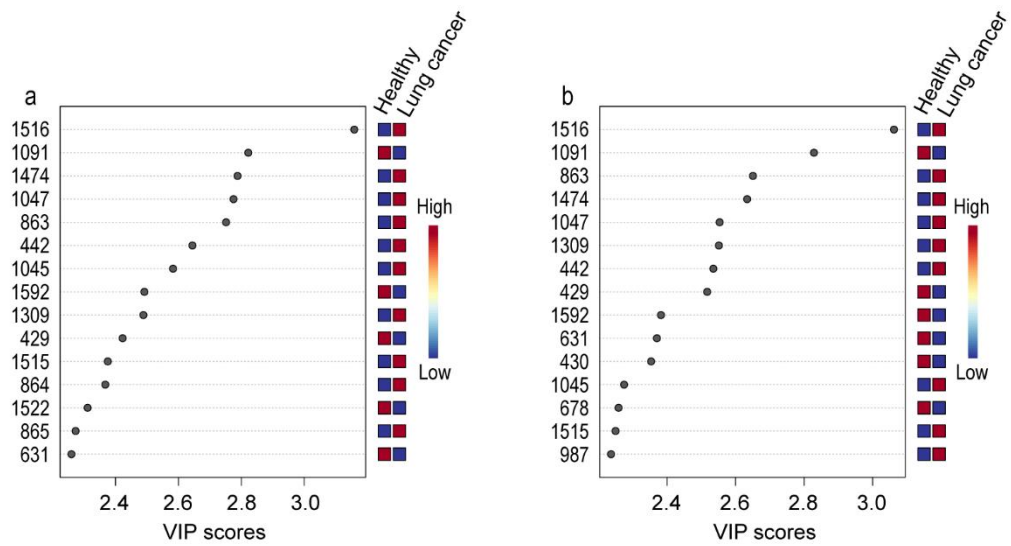

**Fig. S7** Significant SERS features identified by (a) PLS-DA and OPLS-DA from serum samples from the 10 healthy controls and 20 lung cancer patients.



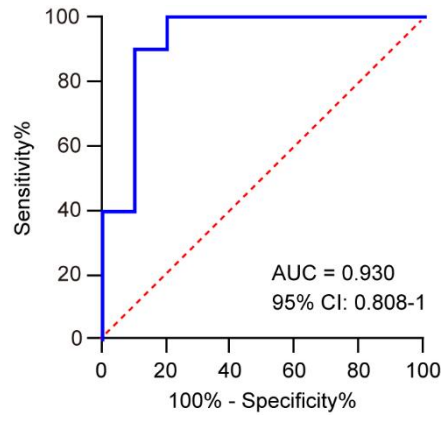

**Fig. S8** Receiver operating characteristic (ROC) curve of classification mode for the validation data.

**Table S1** SLIPSERS peak positions and assignments of vibrational modes of methylene blue

| Peak position (cm <sup>-1</sup> ) | Vibrational mode    | Peak position (cm <sup>-1</sup> ) | Vibrational mode      |
|-----------------------------------|---------------------|-----------------------------------|-----------------------|
| 445                               | df(C-N-C)           | 1183                              | s(C-N)                |
| 505                               | df(C-N-C)           | 1305                              | s(C-C) ring           |
| 598                               | df(C-S-C)           | 1330                              | b(C-H) in-plane       |
| 674                               | b(C-H) out-of-plane | 1394                              | as(C-N)               |
| 774                               | b(C-H) out-of-plane | 1441                              | as(C-N)               |
| 894                               | b(C-H) out-of-plane | 1469                              | s(C-C) ring           |
| 1041                              | b(C-H) in-plane     | 1505                              | as(C-C)               |
| 1158                              | b(C-H) in-plane     | 1625                              | s(C-C) ring, s(C-N-C) |

**Abbreviations:**

b: bending, df: skeletal deformation, s: stretching, as: asymmetric stretching

Band assignments are based on references [S1], [S2], and [S3].

**Table S2** Serum SLIPSERS peak positions and tentative assignments of vibrational modes

| Peak position (cm <sup>-1</sup> ) | Vibrational mode | Tentative assignments                   |
|-----------------------------------|------------------|-----------------------------------------|
| 494                               | /                | L-Arginine, guanine, polysaccharides    |
| 591                               | /                | Amide IV, uric acid                     |
| 640                               | t(C-C)           | L-Tyrosine, lactose                     |
| 747                               | rv               | Thymine                                 |
| 823                               | rb               | Tyrosine                                |
| 855                               | rb               | Tyrosine                                |
| 893                               | b(C-O-H)         | D-Galactosamine                         |
| 928                               | s(C-C)           | Proline, valine                         |
| 1003                              | s(C-C), rb(C-C)  | Phenylalanine                           |
| 1029                              | b(C-H)           | Phenylalanine                           |
| 1054                              | s(C-C, C-O)      | Glycogen, lipids                        |
| 1137                              | s(C-N), ss(C-H)  | D-Mannose                               |
| 1181                              | ss(C-O, C-C)     | Carbohydrates                           |
| 1213                              | s(C-N), b(N-H)   | Amide III ( $\beta$ -pleated sheet)     |
| 1244                              | s(C-N)           | Nucleic acid                            |
| 1289                              | $\alpha$ -helix  | Amide III ( $\alpha$ -helix)            |
| 1372                              | /                | Adenine, thymine                        |
| 1461                              | b(C-H)           | Disaccharides                           |
| 1576                              | s(C=C)           | Phenylalanine, acetoacetate, riboflavin |
| 1600                              | s(C=C)           | Phenylalanine                           |
| 1678                              | s(C=C)           | Amide I ( $\beta$ -pleated sheet)       |

**Abbreviations:**

b: bending, rb: ring breathing, rv: ring vibration, s: stretching, ss: symmetric stretching, t: twist  
Band assignments are based on references [S1], [S2], [S3], [S4], [S5], [S6] [S7], [S8], and [S9].

**Table S3** Baseline characteristics of patients and healthy controls

|                         | Cancer     | Control    |       |
|-------------------------|------------|------------|-------|
| Patient characteristics | (n = 33)   | (n = 23)   | P     |
| Age (years; IQR)        | 65 (56-68) | 59 (55-63) | 0.135 |
| Gender                  |            |            |       |
| Male (%)                | 25 (76%)   | 16 (70%)   | 0.761 |
| Female (%)              | 8 (24%)    | 7 (30%)    |       |
| Histology               |            |            |       |
| Adenocarcinoma (%)      | 23 (70%)   | NA         | NA    |
| Squamous cell (%)       | 7 (21%)    | NA         |       |
| Other                   | 3 (9%)     | NA         |       |
| Stage                   |            |            |       |
| I (%)                   | 2 (6%)     | NA         | NA    |
| II (%)                  | 2 (6%)     | NA         |       |
| III (%)                 | 10 (30%)   | NA         |       |
| IV (%)                  | 19 (58%)   | NA         |       |
| Smoking history         |            |            |       |
| Yes (%)                 | 23 (70%)   | NA         | NA    |
| No (%)                  | 10 (30%)   | NA         |       |

**Abbreviations:**

IQR, interquartile range; NA, nonapplicable.

## References

- S1 X. Dong, H. Gu, J. Kang, X. Yuan, and J. Wu, *Colloids Surf., A*, 2010, **368**, 142-147.
- S2 G.-M. Xiao, and S.-Q. Man, *Chem. Phys. Lett.*, 2007, **447**, 305-309.
- S3 S. H. de Araujo Nicolai, P. R. P. Rodrigues, S. M. LAgostinho, and J. C. Rubim, *J. Electroanal. Chem.*, 2002, **527**, 103-111.
- S4 X. Lin, D. Lin, Y. Chen, J. Lin, S. Weng, J. Song, and S. Feng, *Adv. Funct. Mater.*, 2021, **31**, 2103382.
- S5 H. Li, S. Zhang, R. Zhu, Z. Zhou, L. Xia, H. Lin, and S. Chen, *Spectrochim. Acta, Part A*, 2022, **278**, 121314.
- S6 R. Xiao, X. Zhang, Z. Rong, B. Xiu, X. Yang, C. Wang, W. Hao, Q. Zhang, Z. Liu, C. Duan, K. Zhao, X. Guo, Y. Fan, Y. Zhao, H. Johnson, Y. Huang, X. Feng, X. Xu, H. Zhang, and S. Wang, *Nanomedicine*, 2016, **12**, 2475-2484.
- S7 L. Shao, A. Zhang, Z. Rong, C. Wang, X. Jia, K. Zhang, R. Xiao, and S. Wang, *Nanomedicine*, 2018, **14**, 451-459.
- S8 V. Moisoiu, A. Stefancu, D. Gulei, R. Boitor, L. Magdo, L. Raduly, S. Pasca, P. Kubelac, N. Mehterov, V. Chiş, M. Simon, M. Muresan, A. I. Irimie, M. Baciut, R. Stiufiuc, I. E. Pavel, P. Achimas-Cadariu, C. Ionescu, V. Lazar, V. Sarafian, I. Notingher, N. Leopold, and I. Berindan-Neagoe, *Int. J. Nanomedicine*, 2019, **14**, 6165-6178.
- S9 X. Zheng, G. Wu, J. Wang, L. Yin, and X. Lv, *Biomed. Opt. Express*, 2022, **13**, 1912-1923.
- S10 J. Lei, D. Yang, R. Li, Z. Dai, C. Zhang, Z. Yu, S. Wu, L. Pang, S. Liang, and Y. Zhang, *Spectrochim. Acta, Part A*, 2021, **261**, 120021.
- S11 Z. Wang, Y. Hong, H. Yan, H. Luo, Y. Zhang, L. Li, S. Lu, Y. Chen, D. Wang, Y. Su, and G. Yin, *Spectrochim. Acta, Part A*, 2022, **279**, 121483.
- S12 K. Liu, S. Jin, Z. Song, L. Jiang, L. Ma, and Z. Zhang, *Vib. Spectrosc.*, 2019, **100**, 177-184.
